# Supplementary material
Source: Springer Nature journal article supplement (https://www.springermedizin.de/resource/supplementary/12943_2013_1512_MOESM2_ESM.pdf/9552308)

**A****Control****AT13387 (1  $\mu$ M)****AT13387 (10  $\mu$ M)**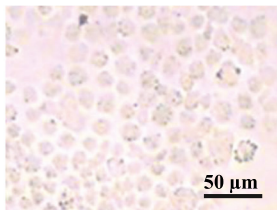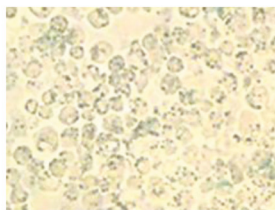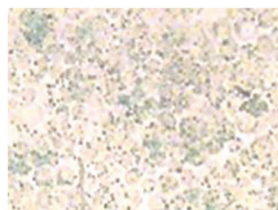**B****Control****AT13387 (1  $\mu$ M)****AT13387 (10  $\mu$ M)**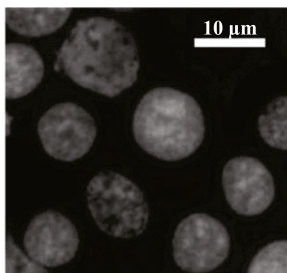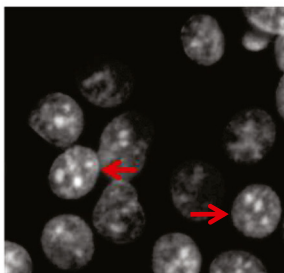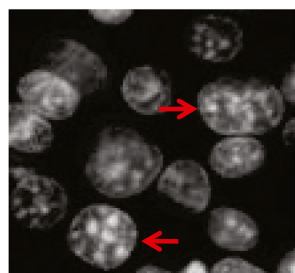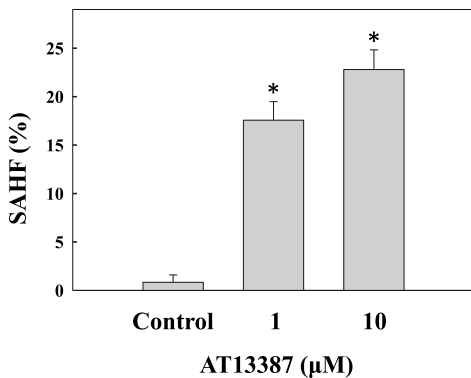

Supplement: MOESM2 [file 9552308]
